# Supplementary material for: Resistance of <em>Borrelia burgdorferi </em>sensu lato Isolates from Serbia to Human Complement
Source: Preprints.org preprint supplement (doi:10.20944/preprints202311.1925.v1), 2023-11-30
Supplement: Supplementary file 1 [file Table S1.docx]

| **Strain** | **OspA** | | **OspB** | | **OspC** | |
| --- | --- | --- | --- | --- | --- | --- |
| *Borrelia valaisana* | |  | |  | |  | |
| RS 164_12b | | 33 | | -a | | 23 | |
| RS 224_10b | | 32 | | - | | - | |
| *Borrelia afzelii* | |  | |  | |  | |
| RS 71_11a | | 33 | | 36 | | 25 | |
| RS 32_12b | | 31 | | 34 | | 22 | |
| RS 230_13c | | 31 | | 34 | | - | |
| RS 164_11a | | 31 | | 34 | | 22 | |
| RS 168_11g | | 31 | | 33 | | 23 | |
| RS 166_12a | | 33 | | 35 | | - | |
| RS 168_11c | | 31 | | 34 | | 22 | |
| RS 163_11i | | 33 | | 34 | | 27 | |
| RS 167_11f | | 31 | | 34 | | 22 | |
| RS 232_13b | | 33 | | 36 | | 24 | |
| RS 168_11a | | 32 | | 35 | | 21 | |
| RS 235_13cd | | 30 | | weakb | | 21 | |
| *Borrelia garinii* | |  | |  | |  | |
| RS 164_11g | | 31 | | - | | weak | |
| RS 226_10a | | 30 | | - | | 22 | |
| *Borrelia bavariensis* | |  | |  | |  | |
| RS 220_10e | | 33 | | 35 | | 24 | |
| RS 160_13e | | 31 | | 33 | | 22 | |
| RS 163_11h | | 32 | | 34 | | 22 | |
| *Borrelia lusitaniae* | |  | |  | |  | |
| RS 77_12b | | 32 | |  | | 23 | |
| RS 226_10d | | 31 | | - | | weak | |
| RS 167_11c | | 31 | | - | | - | |
| RS 162_11b | | 32 | | - | | - | |
| RS 221_10c | | 32 | | - | | - | |
| RS 167_11b | | 31 | | - | | - | |
| RS 76_12a | | 32 | | - | | 22 | |
| RS 222_10d | | 34 | | - | | - | |
| PoHL1 | | +c | | + | | + | |
| Listu | | 31 | | - | | - | |
| Heavy | | 31 | | - | | - | |
| PotiB2 | | - | | + | | - | |

a – (Osp-negative)

b weak (weakly Osp-positive)

c+ (Osp-positive)
